# Supplementary material
Source: publisher figshare collection journal article supplement (https://karger.figshare.com/articles/dataset/_/5123269)
Supplement: Supplementary file 1 [file 1]

**Supplement Table 1.** Clinical and molecular findings and pamidronate treatment results of the patients

| Patient | Sex | Age (years) | Parental consanguinity    | Eye phenotype                                                                                                                                                                                                                                                                                                                     | Bone phenotype                                                                                                                                                                                                                                     | During pamidronate therapy |                   |                       | Homozygous mutations in <i>LRP 5</i> gene                  |
|---------|-----|-------------|---------------------------|-----------------------------------------------------------------------------------------------------------------------------------------------------------------------------------------------------------------------------------------------------------------------------------------------------------------------------------|----------------------------------------------------------------------------------------------------------------------------------------------------------------------------------------------------------------------------------------------------|----------------------------|-------------------|-----------------------|------------------------------------------------------------|
|         |     |             |                           |                                                                                                                                                                                                                                                                                                                                   | Radiological findings                                                                                                                                                                                                                              | Fracture                   | Z score (initial) | Z score (final)       |                                                            |
| 1       | F   | 10.4        | First cousin once removed | Bilateral microphthalmia, retinal detachment, intraocular hemorrhage and shallow anterior chamber. Anteriorly convex and atrophic irises, hazy posterior part of the lens and vitreous, non-homogenous increased vitreous density and left corneal leukoma. Orbital USG revealed hyperechogenous findings on right ocular fundus. | Generalized demineralization, increased dorsal kyphosis and lumbar lordosis, mild lumbosacral scoliosis, platyspondyly with biconcave vertebral bodies, thin long and tubular bones and narrow diaphyses.                                          | +                          | -5.33             | -3.0 (after 7 years)  | R1002X                                                     |
| 2       | F   | 7.7         | First cousin              | Bilateral microphthalmia, left band keratopathy, left aphakia, right persistent hyperplastic primary vitreous and right cataract.                                                                                                                                                                                                 | Generalized demineralization, increased dorsal kyphosis and lumbar lordosis, minimal thoracal scoliosis, severe platyspondyly with biconcave vertebral bodies, thin long and tubular bones, narrow diaphyses, and bilateral acetabular protrusion. | -                          | -4.19             | -1.3 (after 5 years)  | V336M                                                      |
| 3       | M   | 5.6         | First cousin              | Bilateral microphthalmia, cataract, band keratopathy, adhesion between iris and lens and calcification of the right globe. Orbital USG also confirmed the calcified rudimentary right globe and non-discriminative intraocular formations.                                                                                        | Generalized demineralization, bones, increased dorsal kyphosis and lumbar lordosis, severe platyspondyly, fractures on vertebrae, thin long and tubular bones, narrow diaphyses and bent left tibia.                                               | +                          | -6.19             | -2.8 (after 3.5 year) | G507S mutation and possible a large deletion in one allele |

**Supplement Table 2.** The biochemical parameters of the patients

|                                      | Patient 1 | Patient 2   | Patient 3 | Normal values       |
|--------------------------------------|-----------|-------------|-----------|---------------------|
| Calcium                              | 9.7       | 9.6         | 9.8       | 8.4-10.8 mg/dl      |
| Phosphate                            | 4.3       | 4.6         | 4.1       | 2.7-5.5 mg/dl       |
| ALP                                  | 52        | 97          | 142       | 60-525 IU/L         |
| 25-OHD                               | 28.8      | <b>20.5</b> | 36.1      | 20-120 ug/L         |
| PTH                                  | 47.8      | 24.8        | 25.1      | 12-72 pg/ml         |
| Fasting glucose                      | 89        | 86          | 89        | 60-105 mg/dl        |
| Fasting insulin                      | 6.3       | <b>12.6</b> | 6.7       | 2.6-24.9 $\mu$ U/ml |
| 2 <sup>nd</sup> hour glucose in OGTT | 131       | <b>156</b>  | 93        | <140 mg/dl          |
| LDL                                  | 93        | 108         | 66        | 63-130 mg/dl        |
| HDL                                  | 72        | 53          | 63        | 30-75 mg/dl         |
| Total cholesterol                    | 174       | 182         | 144       | 114-200 mg/dl       |
| Triglyceride                         | 61        | NA          | 76        | 30-135 mg/dl        |

ALP:alkaline phosphatase, 25OHD: 25-OH vitamin D, PTH:parathormone,  
OGTT:oral glucose tolerance test, LDL: low density lipoprotein, HDL:high density lipoprotein, NA:not available
