# Supplementary material
Source: publisher figshare collection journal article supplement (https://karger.figshare.com/articles/dataset/_/5123269)

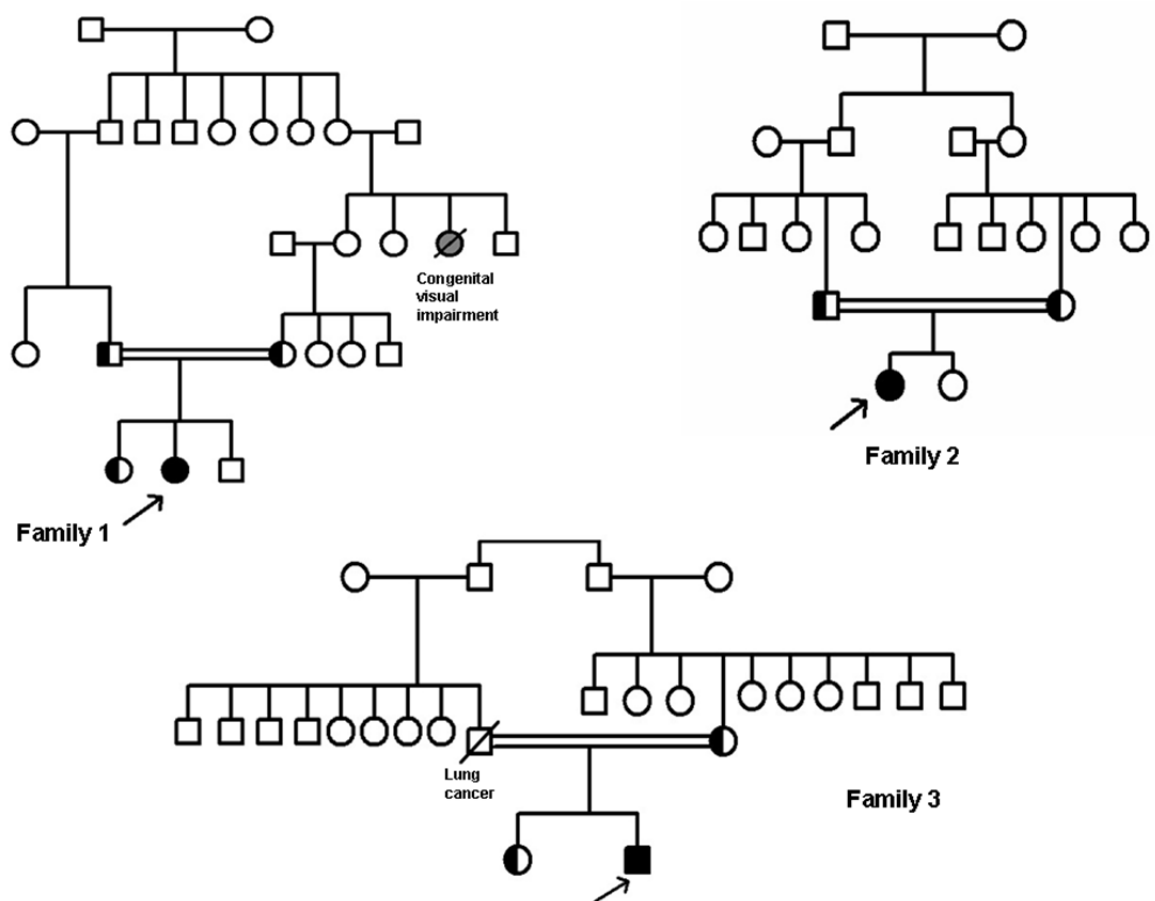

**Supplement Fig. 1.** Pedigrees of the families.

Supplement: Supplementary file 2 [file 1]
